# Supplementary material for: DNA Mechanical Strain Steers Transcription Factor Recognition
Source: Research Square preprint supplement (doi:10.21203/rs.3.rs-7027346/v1), 2026-05-12
Supplement: Supplementary file 2 [file efdfd1a16a6c75bd02df9ba4.pdf]

## Extended data figures and tables for

### DNA Mechanical Strain Steers Transcription Factor Recognition

Yumi Minyi Yao<sup>1</sup>, Michael P. O'Hagan<sup>1</sup>, Karn Onoon<sup>2</sup>, Lihee Givon<sup>1</sup>, Shelly Hamer-Rogotner<sup>3</sup>, Raul Salinas<sup>4</sup>, Raj V. Nithun<sup>5</sup>, Naama Kessler<sup>1</sup>, Muhammad Jbara<sup>5</sup>, Orly Dym<sup>3</sup>, Tanadet Pipatpolkai<sup>6</sup>, Maria A. Schumacher<sup>5</sup>, Ariel Afek<sup>1\*</sup>

<sup>1</sup>Department of Chemical and Structural Biology, Weizmann Institute of Science, Rehovot 7610001, Israel;

<sup>2</sup>Department of Biology, Faculty of Science, Mahidol University, Bangkok 10400, Thailand;

<sup>3</sup>Department of Life Sciences Core Facilities, Weizmann Institute of Science, Rehovot 7610001, Israel;

<sup>4</sup>School of Physical and Mathematical Sciences, Nanyang Technological University, 637371 Singapore;

<sup>5</sup>Department of Biochemistry, Duke University School of Medicine, Durham, NC 27710, USA

<sup>6</sup>School of Physical and Mathematical Sciences, Nanyang Technological University; 637371, Singapore

\*Corresponding Author: [ariel.afek@weizmann.ac.il](mailto:ariel.afek@weizmann.ac.il)

**This PDF file includes:**

Extended Data Figures 1-13

Extended Data Tables 1-3



### **Extended Data Fig. 1 PIC-NIC Pipeline and experimental reproducibility**

**a.** Two strategies to introduce SSBs into DNA TF binding sites using traditional approaches. *Left:* dumbbell-shaped DNA oligos fold on themselves upon fast annealing leaving a nick at the desired position; *Right:* slow annealing of three single-stranded DNA oligos leaves a nick at the desired position. Both methods were employed to yield oligo libraries of nicked TF binding sites. **b.** Schematic representation of the PIC-NIC experimental pipeline, for further details see Supplementary Methods. **c.** PIC-NIC experiments are highly reproducible and robust. *Left:* Binding measurements for the SOX2 protein show strong correlation between two independently synthesized replicate microarrays (Pearson's  $R^2 = 0.9315$ ). *Right:* Data acquired at different TF concentrations remain highly consistent, demonstrating robustness across binding regimes.



**Extended Data Fig. 2 Structural families and contact maps of the 15 TFs employed in this study**

Structural families, PDB ID and detailed protein-DNA H-bond contact maps for the 15 TFs showing backbone contacts (green) and base contacts (turquoise). Contact maps were produced in ChimeraX employing a general cutoff distance of 3.5 Å (tolerance 0.4 Å) and angle cutoff of 100° (tolerance 20°). The binding site shown in the figure is the same length as the binding site chosen for PIC-NIC experiments.

# Extended Data Fig. 3 PIC-NIC binding profiles for the 15 TFs

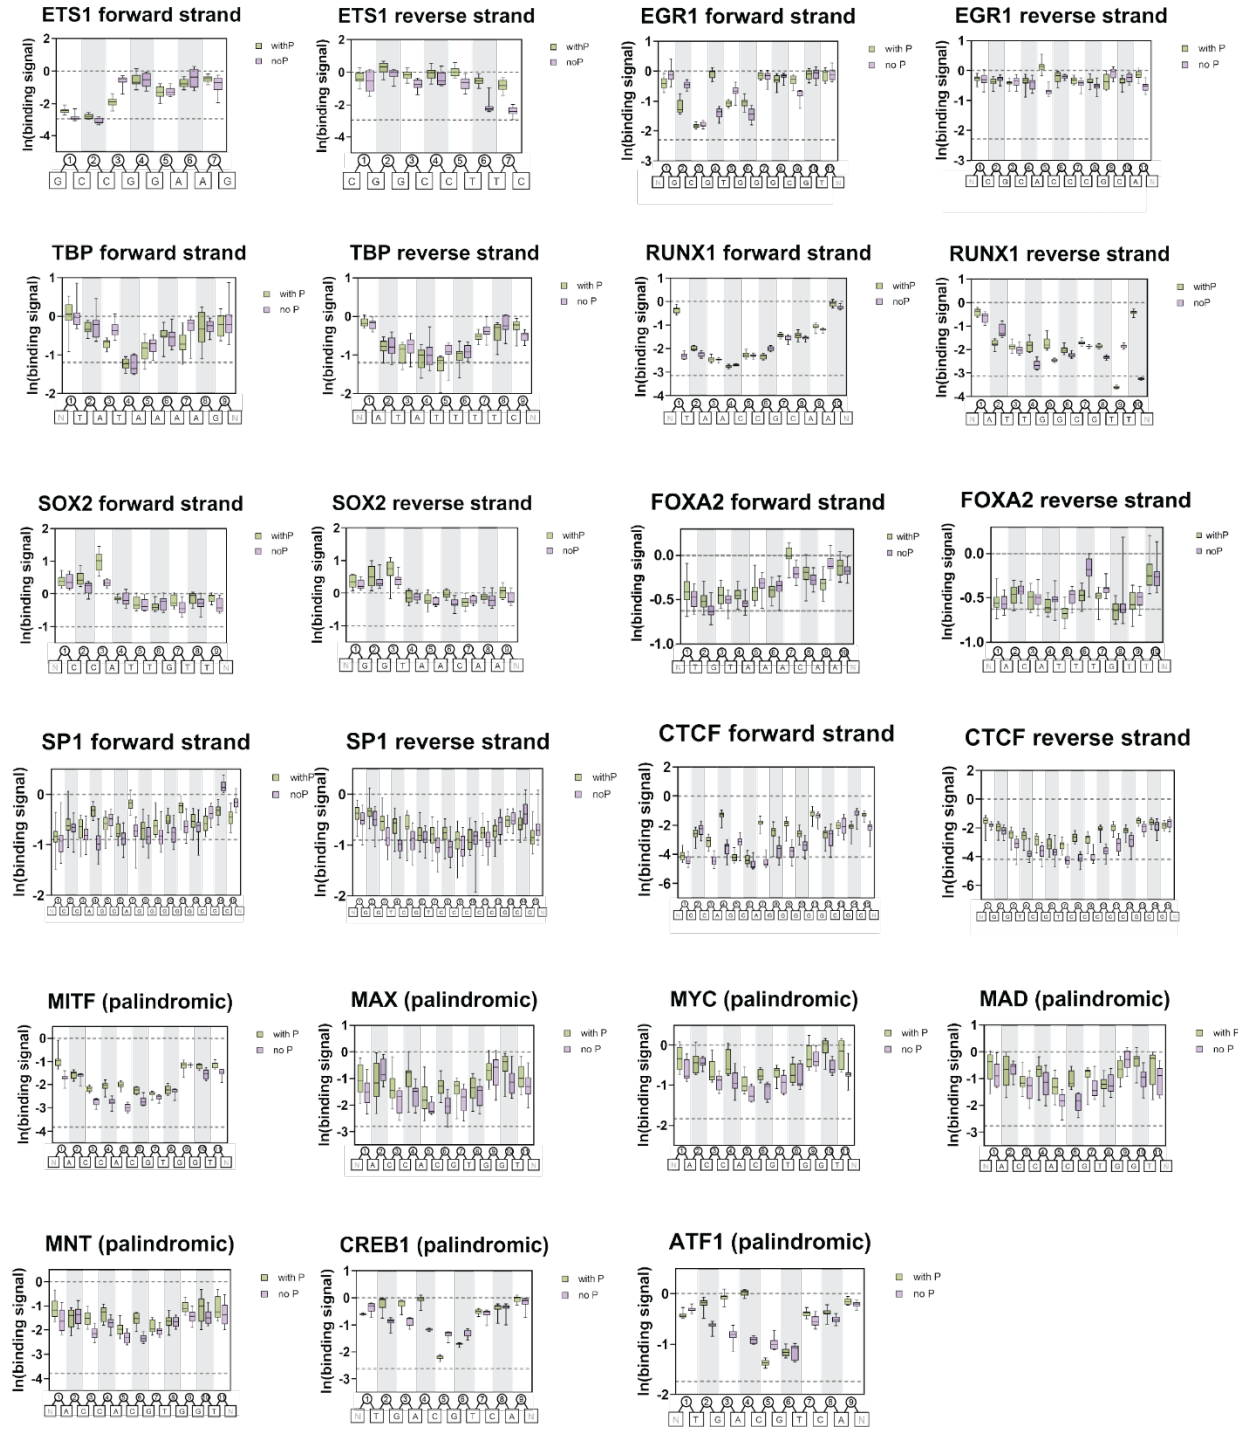

### **Extended Data Fig. 3 PIC-NIC binding profiles for the 15 TFs**

Box-and-whisker plots of binding signal of each TF to its respective binding site containing a nick at the indicated position, either with retention of 5' phosphate (green) or removal of the phosphate (purple). The upper dashed line ( $y=0$ ) represents the binding signal of the target TF to the intact DNA binding site. The lower dashed line represents the binding signal of the target TF to a non-specific site. Each box represents 10-20 spatially scattered replicates of the same DNA binding site on the array.

**Extended Data Fig. 4 Within-family comparison of bHLH family**

**a**

| Structural family | Members in panel         | Within-family profile similarity | Notes                                                                                                         |
|-------------------|--------------------------|----------------------------------|---------------------------------------------------------------------------------------------------------------|
| bHLH              | MITF, MAX, MYC, MAD, MNT | High                             | Consistent sensitivity at central palindrome position across all five members                                 |
| bZIP              | CREB1, ATF1              | High                             | Consistent positional sensitivity pattern across both members                                                 |
| Zinc finger       | EGR1, SP1, CTCF          | Low                              | Divergent profiles, likely reflecting differences in finger number, binding site length, and contact geometry |

**b**

| Protein | Sequence           | Feature | Feature type | NN<br>_position | Predicted<br>_position | Correlation |
|---------|--------------------|---------|--------------|-----------------|------------------------|-------------|
| MAD     | CCAC <b>CGT</b> GG | Roll    | Base step    | 3               | 3                      | 0.83        |
| MAX     | ACCAC <b>CGT</b> G | Roll    | Base step    | 4               | 4                      | 0.82        |
| MITF    | CAC <b>CGT</b> GA  | Rise    | Base step    | 2               | 2                      | 0.84        |
| MYC     | CCAC <b>CGT</b> GG | Roll    | Base step    | 3               | 3                      | 0.83        |

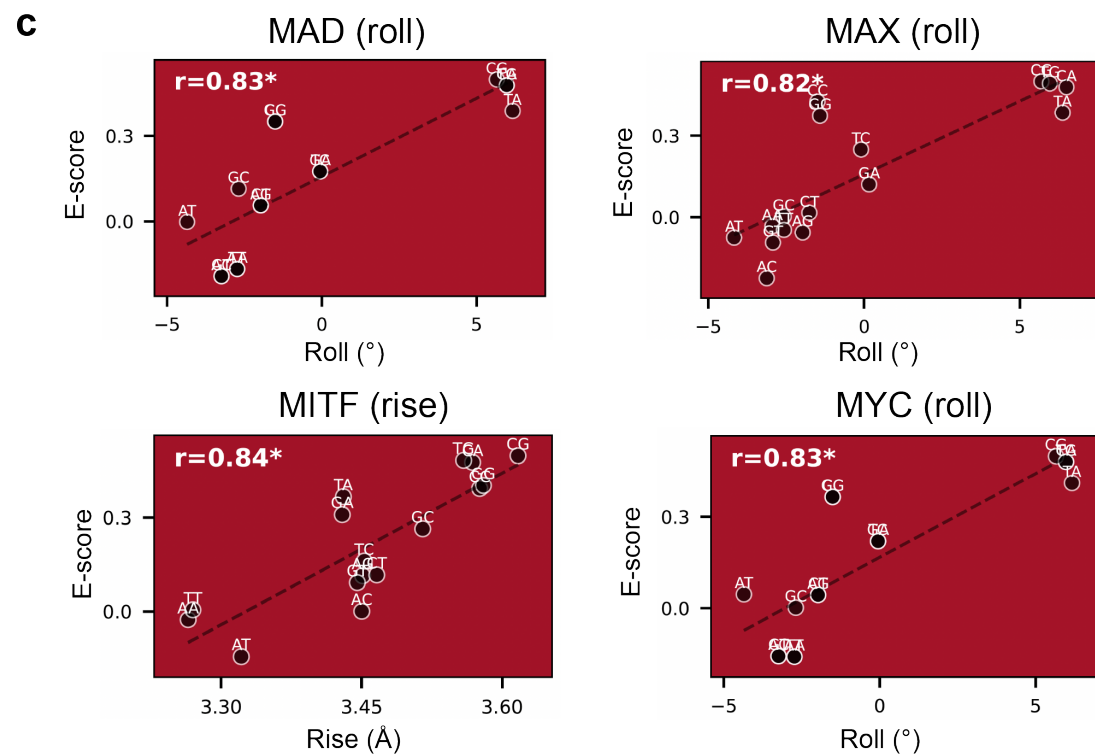

#### **Extended Data Fig. 4 Within-family comparison of bHLH family**

**a.** Within-family comparison of PIC-NIC nick sensitivity profiles across TFs sharing the same structural class. **b.** deepDNASHape correlations at the central CG palindrome position across bHLH family members. All correlations passed Bonferroni correction. **c.** deepDNASHape analysis reveals a conserved structural dependency at the central palindrome position across bHLH family members. Each point represents one of 16 possible dinucleotide substitutions at the central CG position (NN), with the x-axis showing the predicted roll (MAD, MAX, MYC) or rise (MITF) at the CG base step from deepDNASHape, and the y-axis showing the experimentally measured binding score (E-score) from universal PBM data. All four bHLH proteins show significant correlations ( $r = 0.82\text{--}0.84$ ; \*FDR and Bonferroni corrected).

**Extended Data Fig. 5 High-resolution crystal structure analysis of EGR1 in complex with nicked DNA**

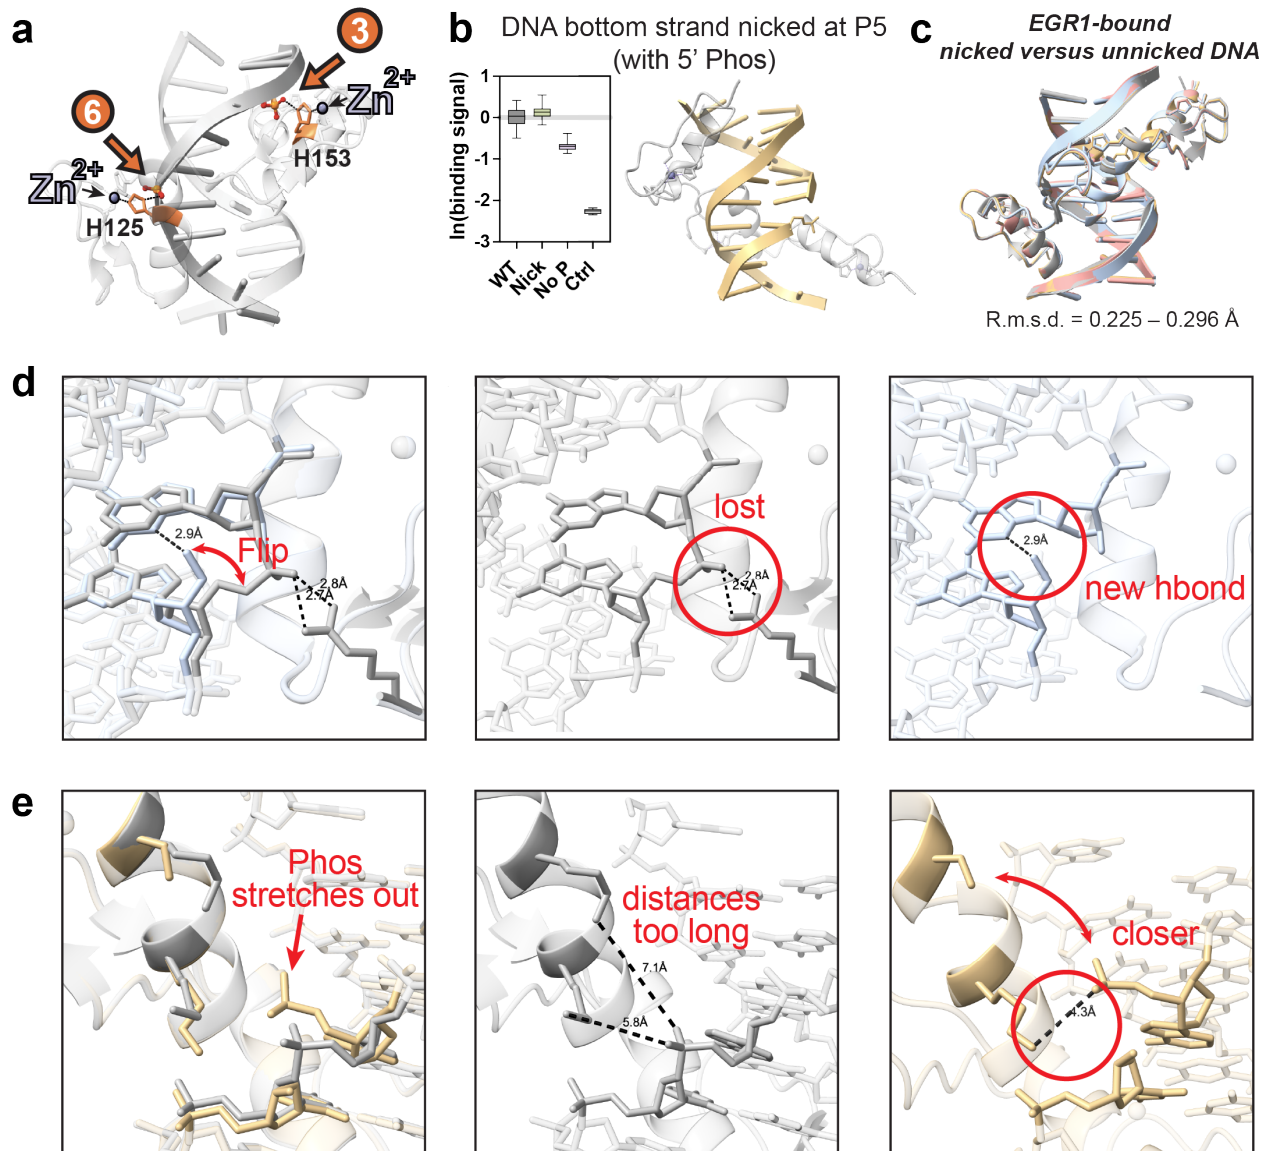

**Extended Data Fig. 5 High-resolution crystal structure analysis of EGR1 in complex with nicked DNA**

**a.** Structural zooms of two zinc coordination sites, highlighting the dual roles of H125 and H153 in DNA phosphate interaction and zinc finger coordination, rendering these positions highly sensitive to nicking. **b.** No disruption of EGR1 binding is observed when the DNA is nicked at position 5 on the bottom strand (5' phosphate retained), while when the 5' phosphate is removed,

only minor disruption is observed. The high-resolution crystal structure of EGR1 in complex with DNA nicked at position 5 on the bottom strand (5' phosphate retained) is solved. **c.** Overlay of EGR1 bound to intact and three nicked DNA duplexes reveals high structural similarity (RMSD = 0.225 - 0.296 Å), indicating minimal global deformation. **d.** Structural changes when the DNA is nicked at position 7 on the top strand (phosphate removed). Gray: EGR1/intact DNA complex; blue: EGR1/nicked DNA complex. *Left panel:* Compared to the intact DNA, the backbone at the break site in the nicked DNA flips direction and induces a conformational change. *Middle panel:* The original H-bonds between Arg103 and the backbone phosphate are lost due to the phosphate removal at this position. *Right panel:* Due to the flipping of the backbone in the nicked structure, a new intramolecular H-bond is formed between the backbone OH and the neighboring guanine base. **e.** Structural changes when the DNA is nicked at position 5 on the bottom strand (phosphate retained). Gray: EGR1/intact DNA complex; gold: EGR1/nicked DNA complex. *Left panel:* When nicked, the backbone phosphate stretches away from its original position and the backbone geometry around the nicked phosphate is altered. *Middle panel:* In the intact DNA complex, the distances between the amino acid residues and DNA phosphate backbone at this position are too long to contribute to stabilizing interactions. *Right panel:* Due to the conformational stretch of the phosphate backbone in the nicked complex, the distances between nearby Arg and Lys residues and this backbone phosphate are shortened, and thus new favorable interactions emerge.

**Extended Data Fig. 6 Orthogonal assays converge on key backbone phosphates in ETS1-DNA recognition**

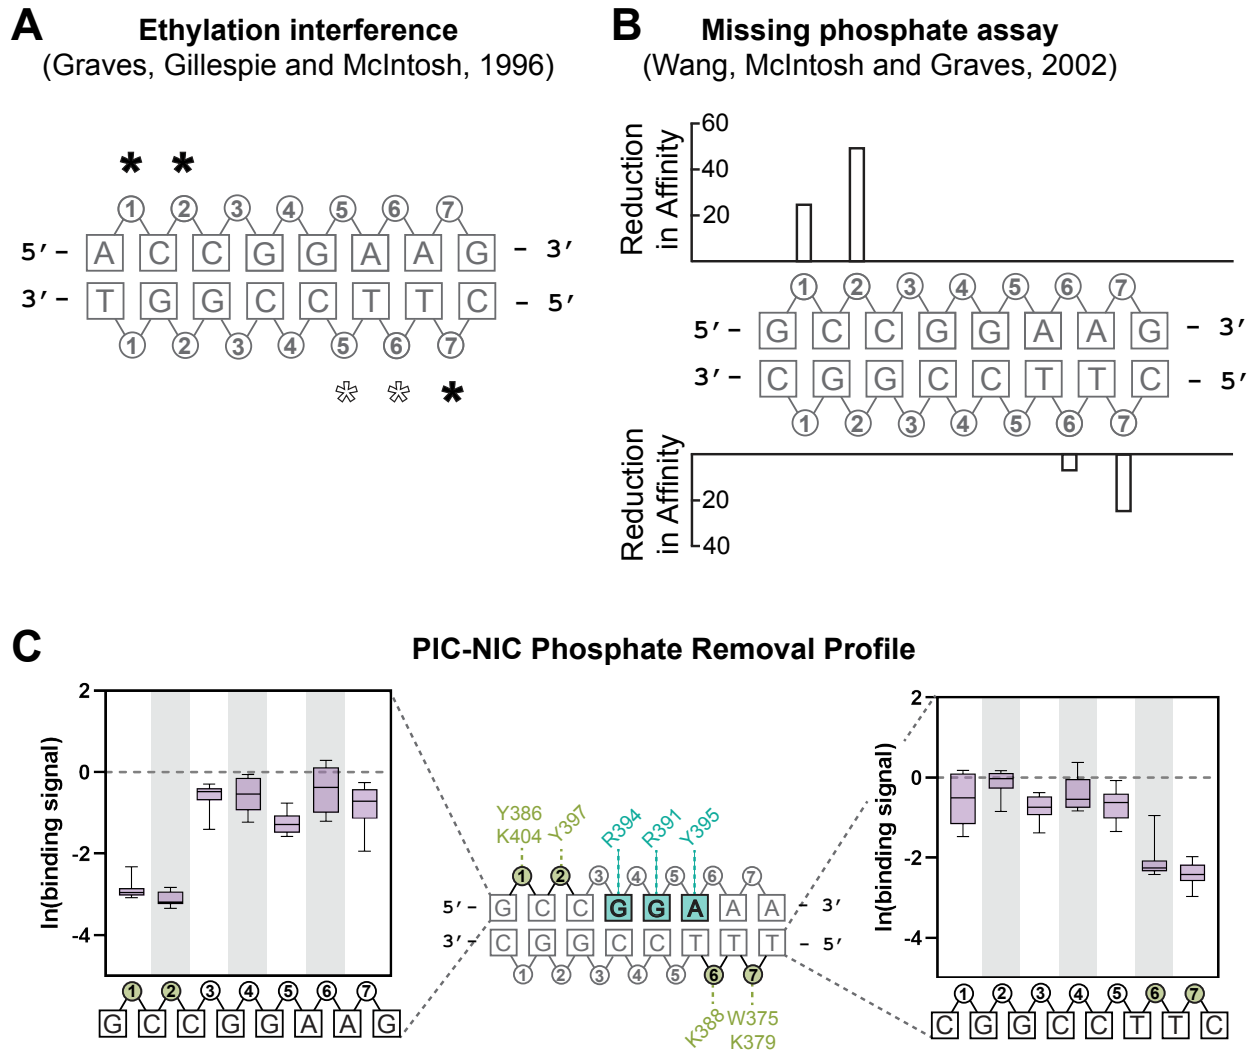

**Extended Data Fig. 6 Orthogonal assays converge on key backbone phosphates in ETS1-DNA recognition**

**a.** Phosphate contacts between ETS domain and DNA as implicated by ethylation-interference analysis. Adapted from Graves, Gillespie and McIntosh, 1996. **b.** Summary of “missing phosphate” experiment data. Open and closed bars display the reduction in affinity of  $\Delta N331$  and  $\Delta N280$ , respectively, for nicked duplexes relative to unnicked duplex:  $K_D(\text{nicked})/K_D(\text{unnicked})$ . Adapted from Wang, McIntosh and Graves, 2002. **c.** Phosphate removal profile of ETS1 from PIC-NIC

experiment. All three approaches agreed on the same phosphates that are important in ETS1/DNA interaction.

Extended Data Fig. 7 ETS1 BSA analysis and ETS1-PARP1 competition assay

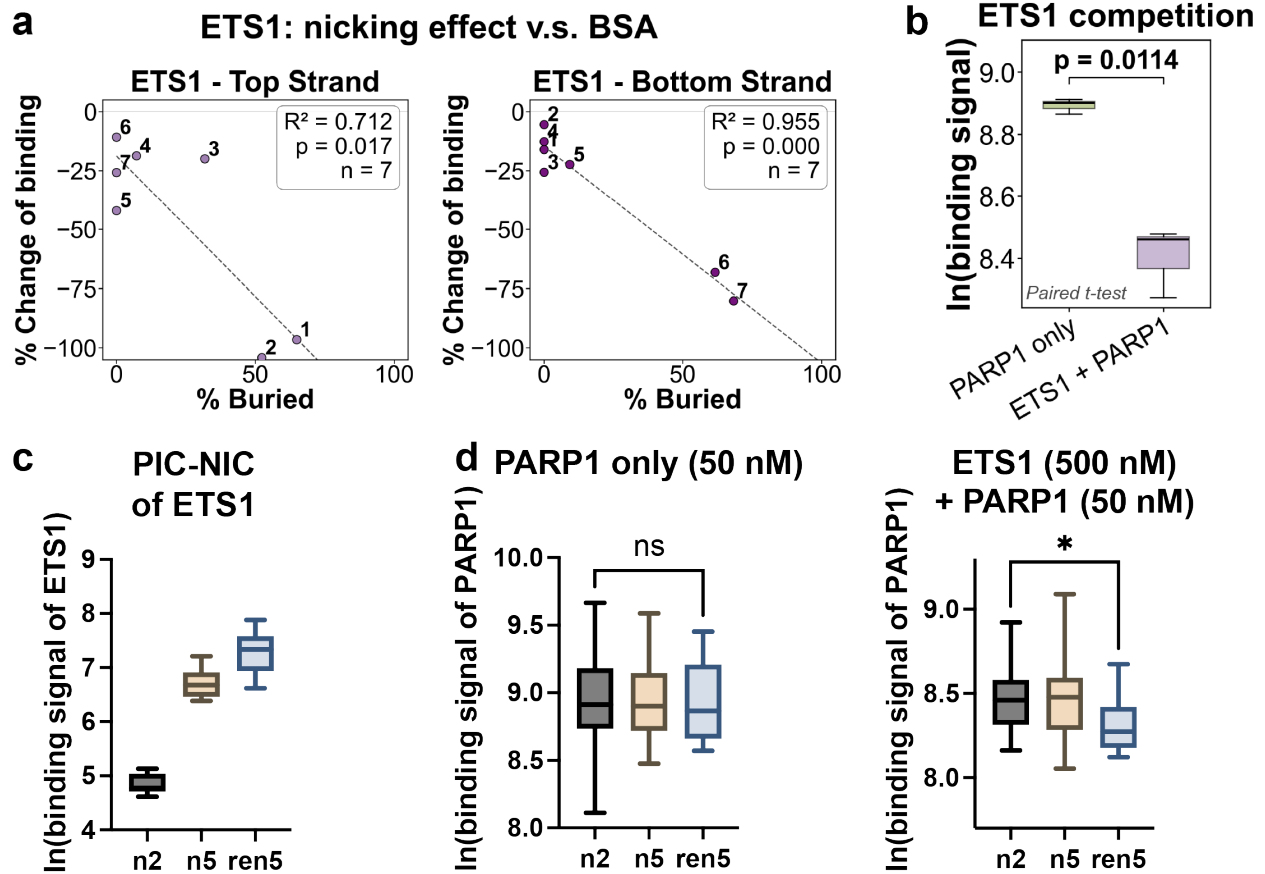

Extended Data Fig. 7 ETS1 BSA analysis and ETS1-PARP1 competition assay

**a.** Correlation between phosphate burial and PIC-NIC nick sensitivity for ETS1. For each phosphate position along the top strand (left) and bottom strand (right) of the ETS1 binding site, the percentage of phosphate surface area buried upon protein binding (% Buried, x-axis; calculated as  $BSA/SASA \times 100$ ) is plotted against the percentage change in binding signal upon phosphate removal in PIC-NIC (% Change of binding, y-axis). Numbers indicate binding site positions. Dashed line shows linear regression fit. Statistics shown are for Pearson correlation ( $n = 7$  positions per strand). **b.** ETS1 and PARP1 compete for nicked sites. PARP1 binding signal (ln intensity values, median of 20 replicates per probe) across 3 nicked ETS1 binding site probes, measured in the absence (PARP1 only, green) or presence (ETS1 + PARP1, purple) of competitor ETS1. Addition of ETS1 significantly reduces PARP1 occupancy at nicked sites ( $p = 0.0114$ , paired t-test). **(c)** PIC-NIC binding profiles for three selected probes: n2 (largest reduction in ETS1 binding upon nicking), n5 (intermediate), and ren5 (minimal reduction), showing distinct nick-sensitivity

profiles. **(d)** *Left*: In the absence of ETS1, all three probes show comparable PARP1 binding (50 nM PARP1; ns, not significant). *Right*: Pre-incubation with 500 nM ETS1 followed by 50 nM PARP1 reveals significantly lower PARP1 occupancy at ren5 compared to n2 (\*p = 0.0112), consistent with stronger ETS1 competition at the less nick-sensitive position.

**Extended Data Fig. 8 ETS1 mutants at phosphate-contacting residues exhibit differential binding in comparison to the WT protein.**

**a**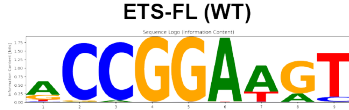**b**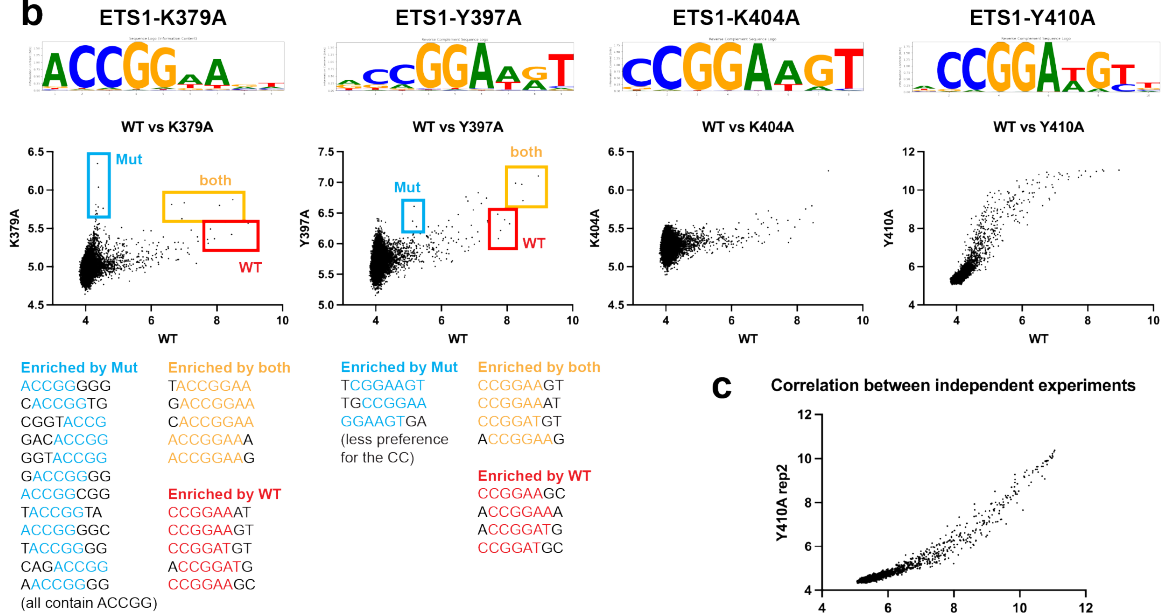**d**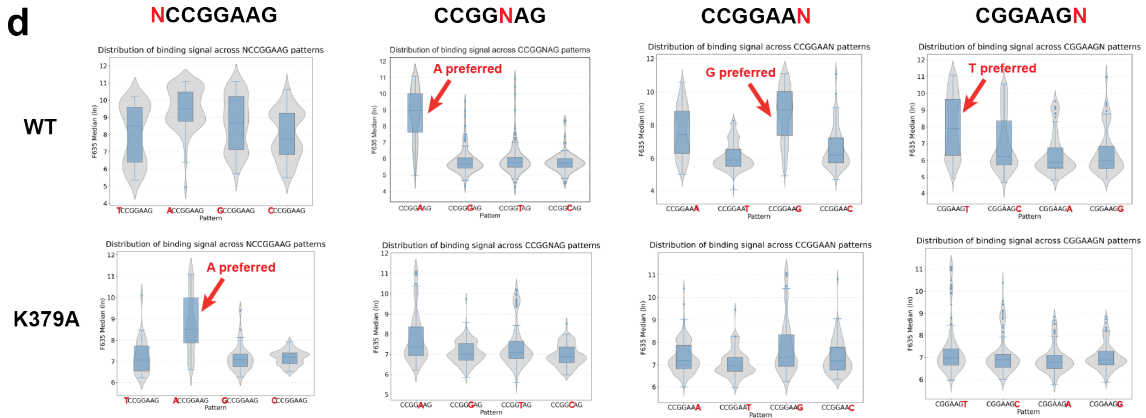**e**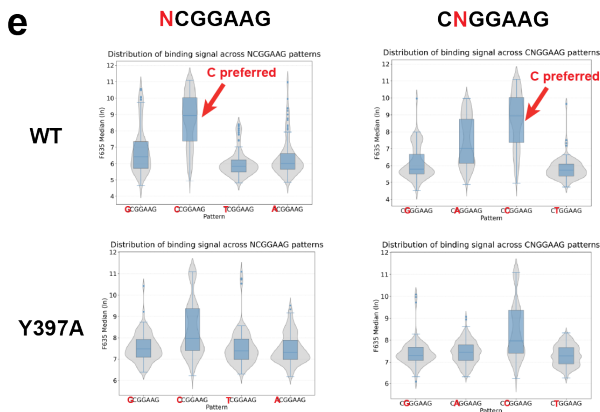**f**

ETS1 binding-structural correlation

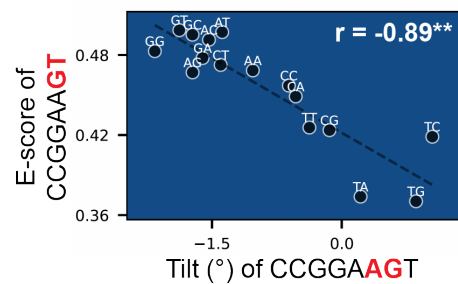

**Extended Data Fig. 8 ETS1 mutants at phosphate-contacting residues exhibit differential binding in comparison to the WT protein.**

**a.** PWM logo of full-length wild-type ETS1 protein, generated from experimental data of the universal protein binding microarray containing all possible DNA 10-mer sequences. **b. Top panels:** PWM logos of four ETS1 mutants (K379A, Y397A, K404A and Y410A), generated using an identical universal 10-mer microarray design. **Middle panels:** Binding signal correlations of the four ETS1 mutants versus the ETS1 WT. Each point represents a DNA 8-mer sequence. Blue box highlights the 8-mer sequences preferred by the respective ETS1 mutant; red box highlights the 8-mer sequences preferred by the WT ETS1; yellow box highlights the 8-mer sequences highly bound by both the mutant and WT ETS1. **Bottom panels:** 8-mer sequences corresponding to the highlighted boxes in the middle panels. **c.** Correlation of replicate experiments (from independent protein expression) confirms high reproducibility. **d-e.** Comparison of nucleotide preference at this indicated position (N) for WT ETS1 and **d** K379A and **e** Y397A. **f.** deepDNASHape analysis for ETS1. Predicted tilt at the AG base step correlates with experimentally measured binding scores (E-score) when the flanking GT dinucleotide is systematically varied ( $r = -0.89$ , \*\*Bonferroni corrected). Each point represents one of 16 possible dinucleotide substitutions at the GT position; the varied dinucleotide is highlighted in red in the sequence labels. Dashed line shows linear regression fit.

## Extended Data Fig. 9 Bio-Layer Interferometry (BLI) data for ETS1 and SOX2

**a**

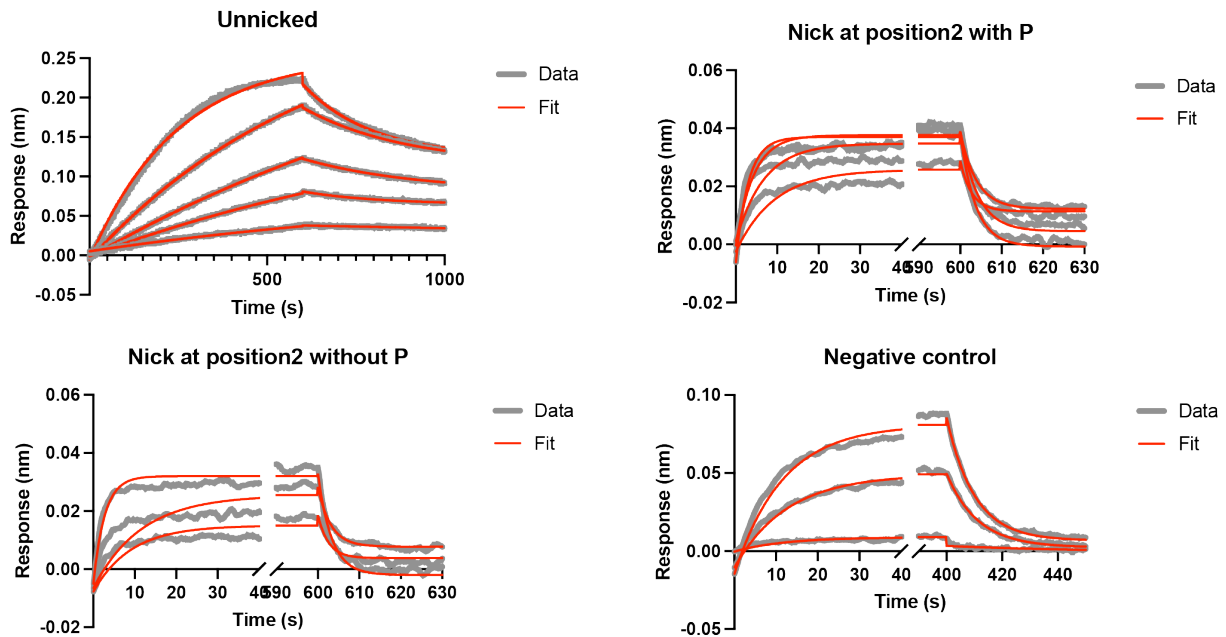

|          | $K_d$ ( $\times 10^{-7}$ M) | $K_{on}$ ( $\times 10^5$ M $^{-1}$ s $^{-1}$ ) | $K_{off}$ ( $\times 10^{-3}$ s $^{-1}$ ) |
|----------|-----------------------------|------------------------------------------------|------------------------------------------|
| Unnicked | $0.3 \pm 0.1$               | $2.5 \pm 1.0$                                  | $6.2 \pm 0.2$                            |
| n2P      | $9 \pm 4$                   | $4 \pm 2$                                      | $251 \pm 40$                             |
| n2       | $9 \pm 7$                   | $4 \pm 2$                                      | $220 \pm 82$                             |
| Neg Ctrl | $10 \pm 3$                  | $2.7 \pm 0.8$                                  | $267 \pm 7$                              |

~40 fold faster dissociation compared to unnicked

**b**

|            | $K_d$ ( $\times 10^{-9}$ M) | $K_{on}$ ( $\times 10^5$ M $^{-1}$ s $^{-1}$ ) | $K_{off}$ ( $\times 10^{-3}$ s $^{-1}$ ) |
|------------|-----------------------------|------------------------------------------------|------------------------------------------|
| Unnicked   | $5.0 \pm 0.6$               | $3.0 \pm 0.3$                                  | $1.49 \pm 0.05$                          |
| nick at P3 | $2.9 \pm 0.4$               | $5.8 \pm 0.9$                                  | $1.68 \pm 0.04$                          |

**c**

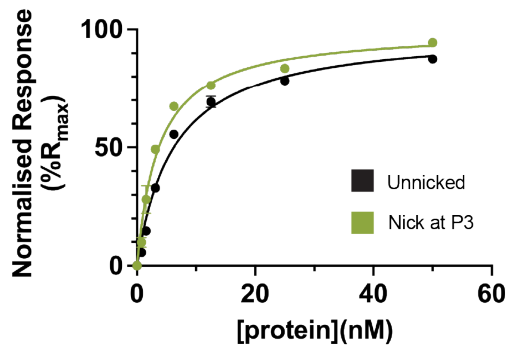

### Steady State Kinetics

|            | Thermodynamic $K_d$ ( $\times 10^{-9}$ M) |
|------------|-------------------------------------------|
| Unnicked   | $6 \pm 1$                                 |
| nick at P3 | $3.7 \pm 0.9$                             |

### Extended Data Fig. 9 Bio-Layer Interferometry (BLI) data for ETS1 and SOX2

**a.** Bio-Layer Interferometry (BLI) sensorgrams (grey) of WT ETS1 binding to the intact (unnicked) DNA probe, the DNA probe nicked at position 2 (n2P), the DNA probe nicked at position 2 with the removal of 5' phosphate (n2), and a probe containing a non-specific site (neg ctrl). Sensorgrams at each concentration were fit locally to a 1:1 binding model (red) at each concentration to determine  $k_{\text{on}}$  and  $k_{\text{off}}$  values.  $K_{\text{D}}$  values were calculated for each curve, and the means and standard deviations derived from these values are presented. Compared to the intact DNA probe, the binding to n2P, n2 and neg ctrl exhibited ~40-fold faster dissociation. **b.** Kinetic  $K_{\text{D}}$ ,  $k_{\text{on}}$  and  $k_{\text{off}}$  values derived from sensorgrams of SOX2 binding to the intact DNA probe and DNA probe nicked at position 3 (Fig. 4c).  $k_{\text{on}}$  and  $k_{\text{off}}$  values were obtained by global fitting of sensorgrams to a 1:1 binding model. **c.** Thermodynamic  $K_{\text{D}}$  of SOX2 binding to the intact DNA probe and DNA probe nicked at position 3 were calculated from 7 concentrations using a one-site binding model at equilibrium. The observed ~1.6-fold change in the thermodynamic  $K_{\text{D}}$  aligns with the ~1.7-fold change in the obtained kinetic  $K_{\text{D}}$  above.

Extended Data Fig. 10 All atom Molecular Dynamic (MD) simulations for ETS1

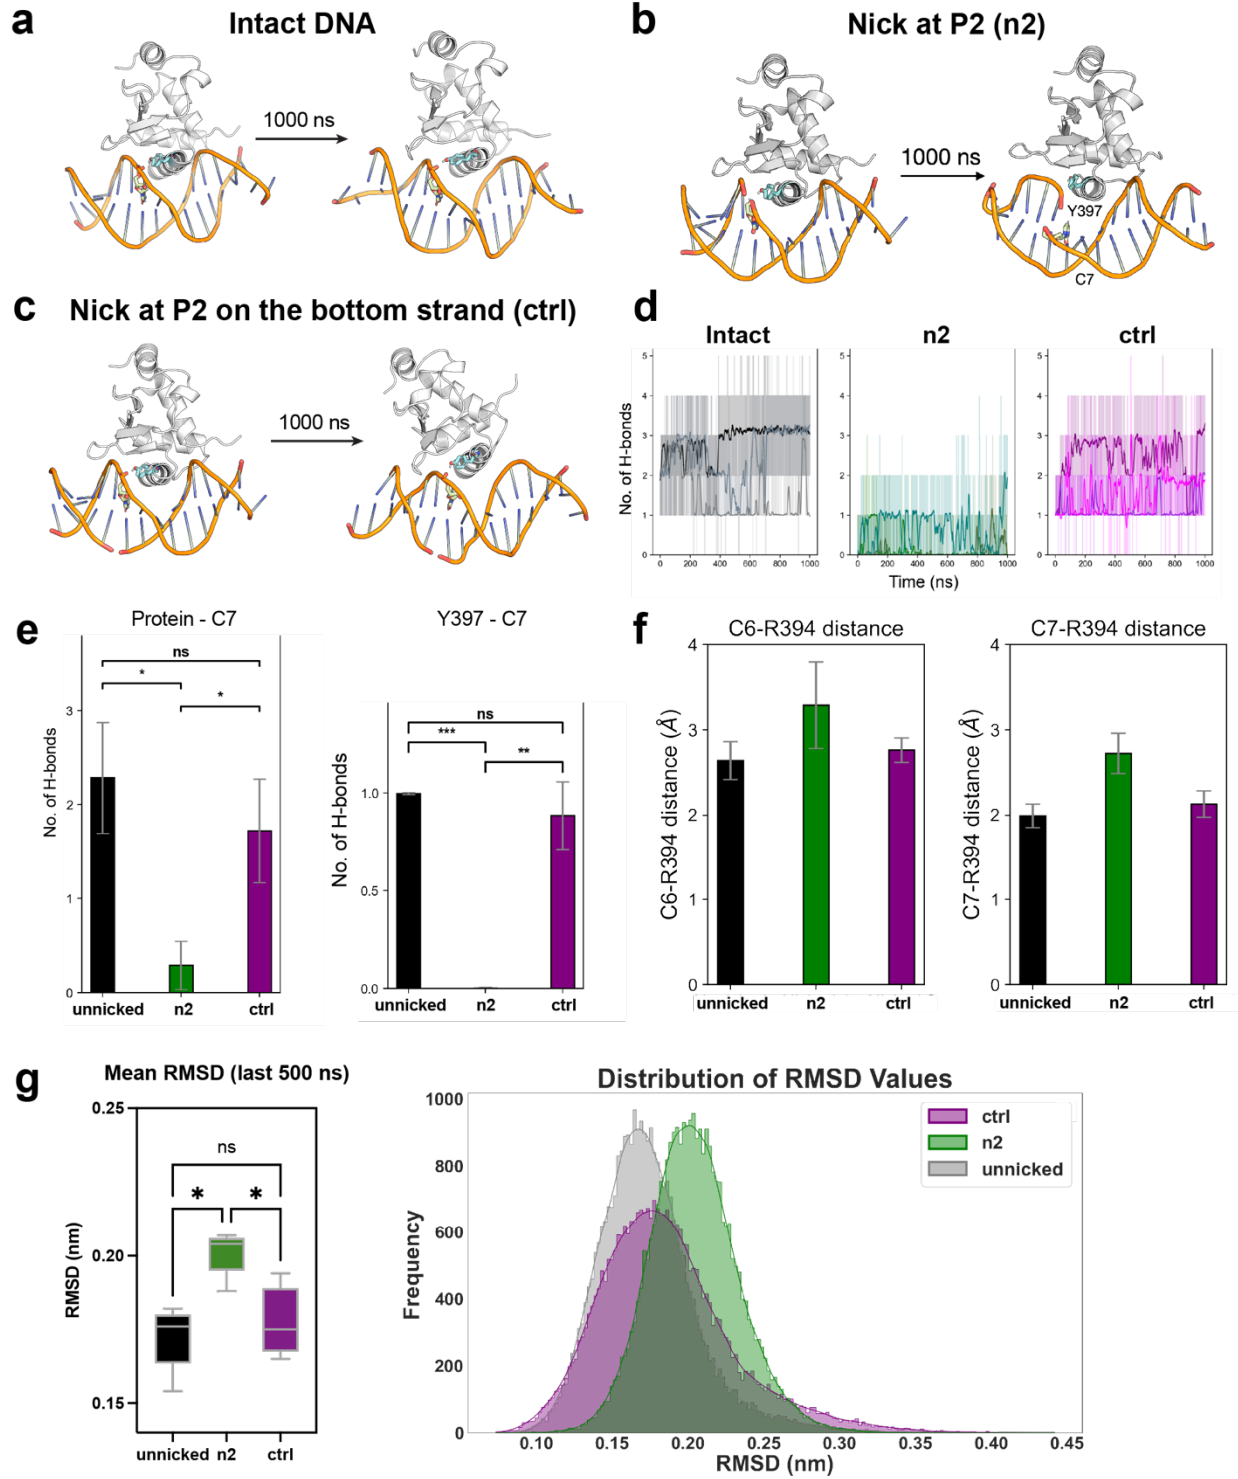

### Extended Data Fig. 10 All atom Molecular Dynamic (MD) simulations for ETS1

**a.** MD simulation snapshots of wild-type ETS1 bound to intact DNA over a 1000 ns trajectory, serving as a structural reference for nick-induced perturbation analysis. **b.** MD simulation snapshots of wild-type ETS1 bound to DNA nicked at position 2 (with the removal of 5' phosphate), where the nick abolishes binding, over a 1000 ns trajectory. Distinctive local distortion of the DNA backbone geometry is observed at the break site. **c.** MD simulation snapshots of wild-type ETS1 bound to DNA nicked at position 2 at the bottom strand (with the removal of 5' phosphate), where the nick does not induce a major effect in binding of the TF, over a 1000 ns trajectory, serving as negative control. **d.** Time-dependent H-bond analysis across the simulation trajectory for the three constructs. In n2, the removal of the phosphate in contact with Y397 leads to the overall loss of hydrogen bonds over the 1000 ns trajectory. **e.** Hydrogen bonds formed between the protein and DNA at C7 (left), and specifically between Y397 and C7 (right), across the simulation trajectories. The n2 nick significantly reduces hydrogen bonding, unlike the control nick, and this effect is caused by the removal of C7 backbone phosphate at the break site. **f.** Average distances from C6 and C7 to R394 reveal that the n2 nick increases these distances relative to the wild-type and control, weakening interactions and reflecting geometric disruption of the protein–DNA interface. **g.** *Left panel:* Root-mean-square deviation (RMSD) of backbone atoms in the last 500 ns of simulation (assuming equilibrium has been reached) shows that the n2 nick increases structural fluctuations compared to the wild-type and control. *Right panel:* Distribution of RMSD values for the last 500 ns trajectory shows a rightward shift in the n2 nicked complex (green), indicating elevated structural flexibility compared to the wild-type (gray) and control nick (magenta).

**Extended Data Fig. 11 High-resolution crystal structure analysis of TBP in complex with nicked DNA**

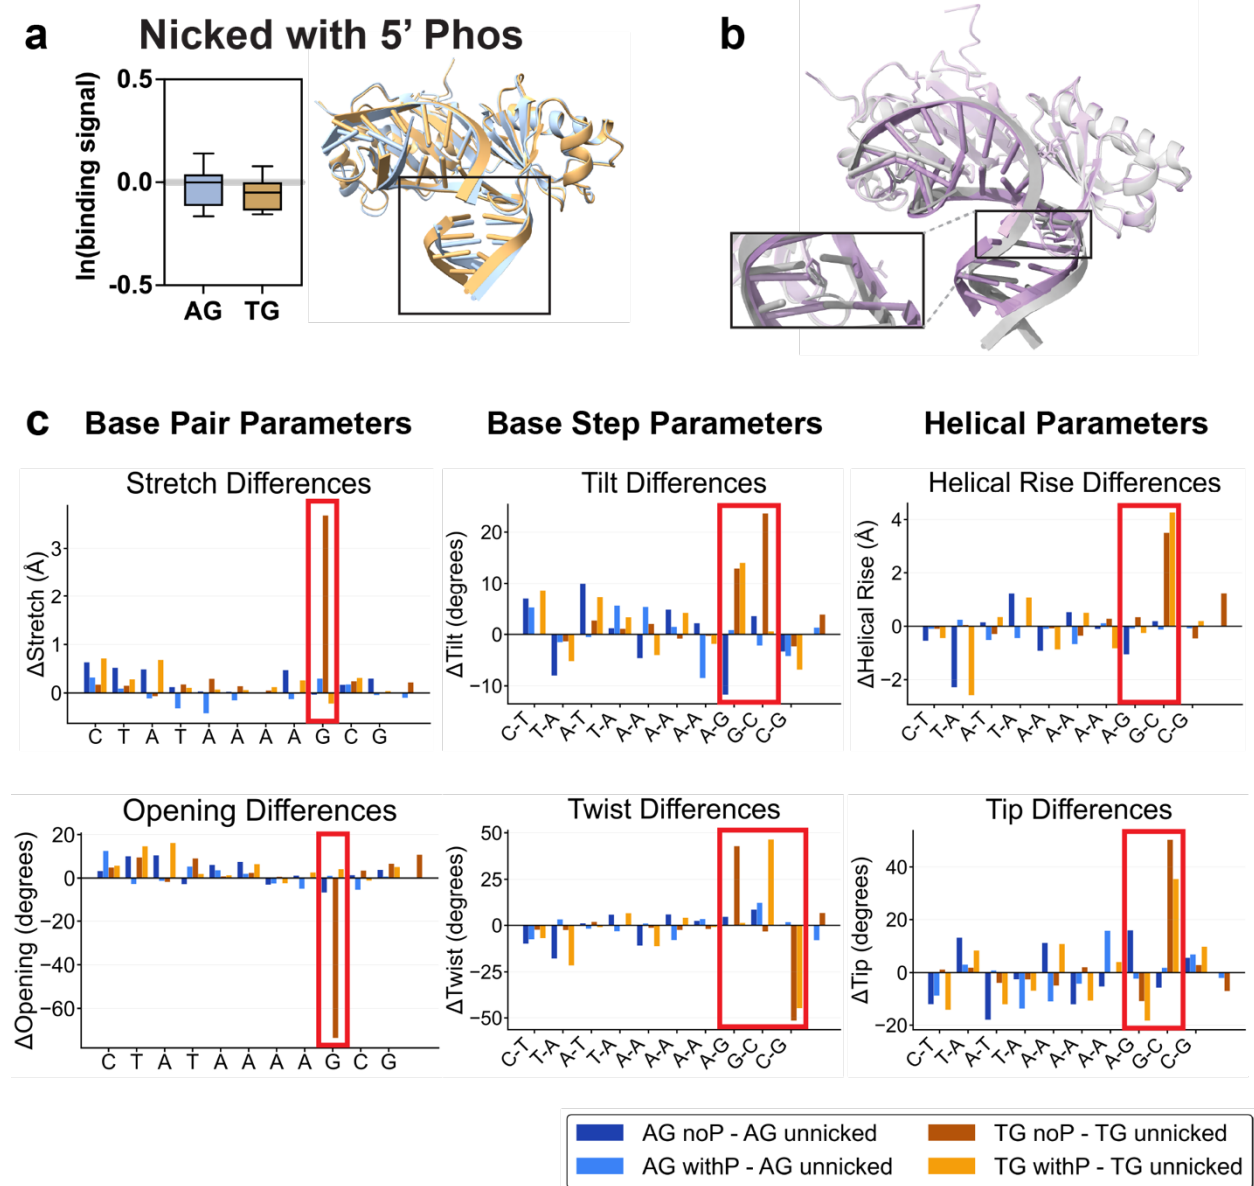

## **Extended Data Fig. 11 High-resolution crystal structure analysis of TBP in complex with nicked DNA**

**a.** The binding level of TBP to the AG variant becomes almost identical to that of the TG variant when position 8 at the bottom strand is nicked with the retention of 5' phosphate. Two high-resolution crystal structures of nicked complexes corresponding to the AG variant and the TG variant were solved (Blue: AG variant complex; gold: TG variant complex). Structural overlay reveals a larger DNA bending angle in the TG complex compared to the same region in the AG complex. **b.** Structural overlay and zoom in of the TG nicked complex (with the removal of 5' phosphate at the break site) and TG intact complex (gray: intact TG complex; purple: nicked TG complex with no 5' phosphate). When nicked, the DNA geometry deviates significantly from that of intact DNA, introducing a larger bending angle and more deformation. The structural zoom in shows dramatic local shifts in the base pair geometry flanking the nick site, suggesting that the nick disrupts the local DNA architecture. **c.** Structural analysis of the four solved crystal structures shows that the TG nicked complex with no 5' phosphate has the largest deformation at the nick site. Representative base pair parameters (stretch and opening), base step parameters (tilt and twist) and helical parameters (helical rise and tip) were chosen to illustrate the parameter difference between nicked and intact complexes.

Extended Data Fig. 12 All atom Molecular Dynamic (MD) simulations for SOX2

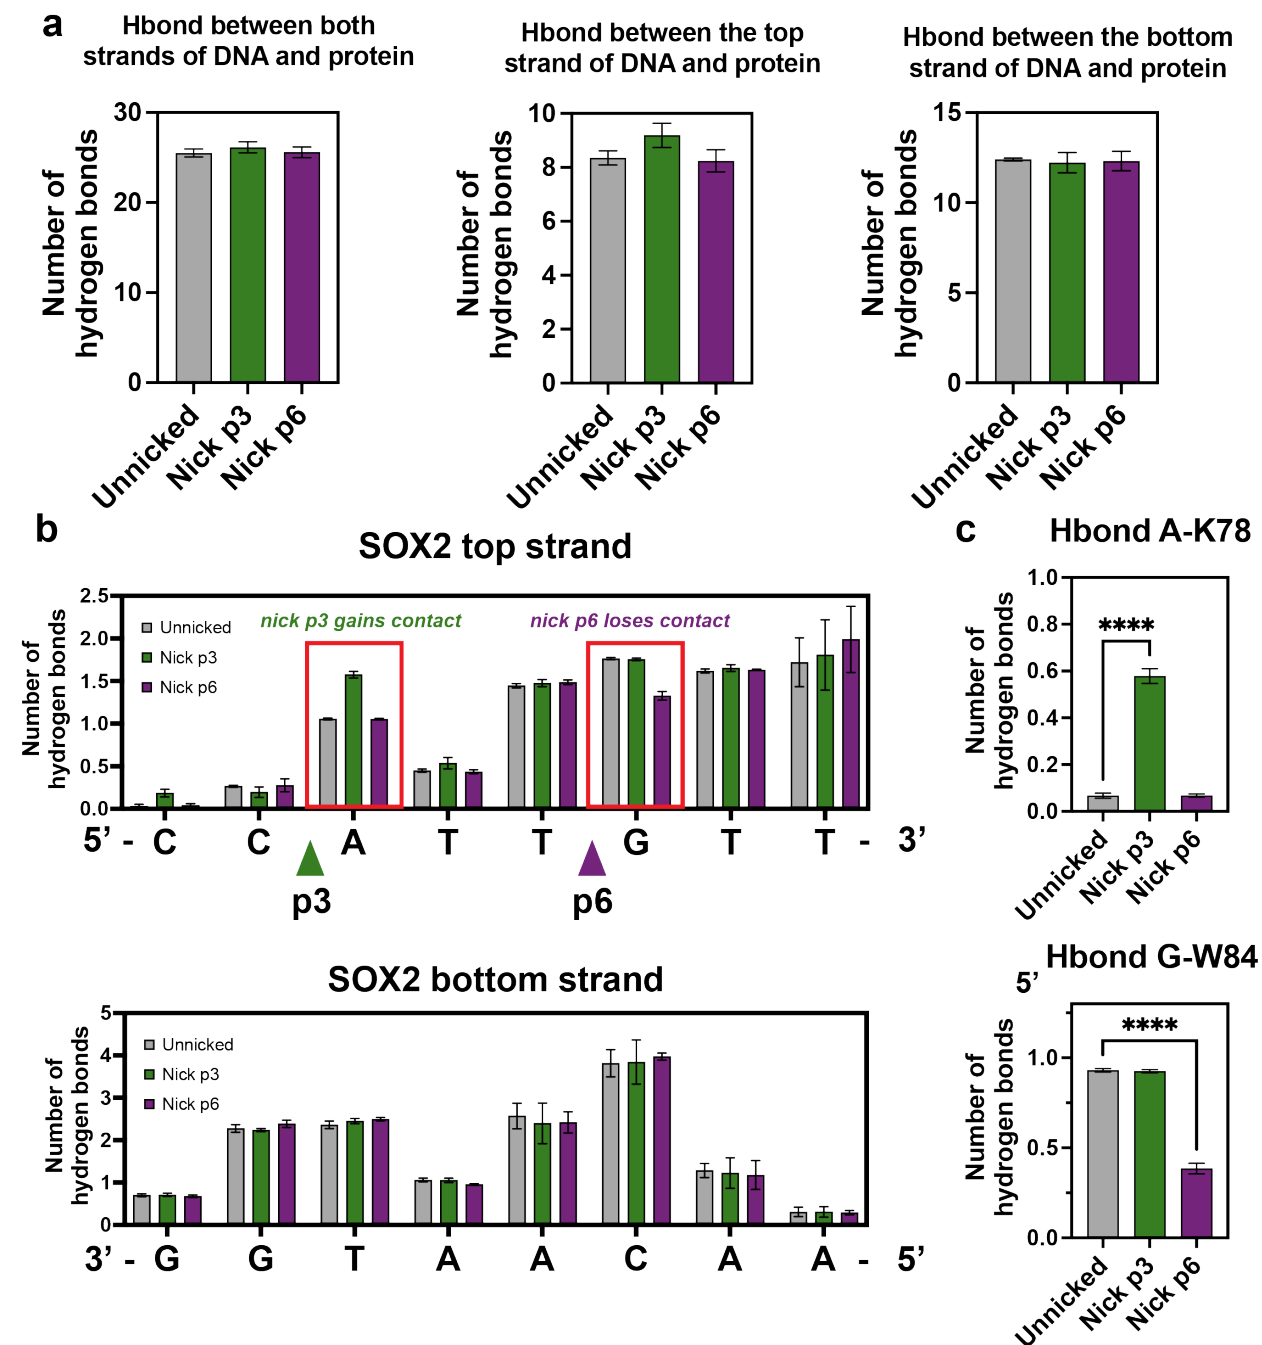

Extended Data Fig. 12 All atom Molecular Dynamic (MD) simulations for SOX2

(a) Total number of protein–DNA hydrogen bonds across 3 independent MD replicates for unnicked DNA (grey), DNA nicked at position p3 (green), and DNA nicked at position p9 (magenta), counted across both strands (left), the top strand only (middle), and the bottom strand only (right). (b) Per-nucleotide hydrogen-bond occupancy along the SOX2 binding site, top strand

(upper) and bottom strand (lower). Green and magenta triangles mark the p3 and p6 nick sites, respectively. Red boxes highlight the two positions where contact patterns diverge: SOX2 gains hydrogen bond interactions significantly at the A adjacent to the p3 nick when p3 is nicked, and loses hydrogen bond interactions significantly at the G adjacent to the p6 nick when p6 is nicked. **(c)** A closer investigation at the two positions highlighted in (c), confirming a significant gain of interaction with K78 at A in the p3-nicked state and a significant loss of interaction with W84 at G in the p6-nicked state.

# Extended Data Fig. 13 SSBs accumulate at TF binding sites and engage the DNA repair machinery *in vivo*

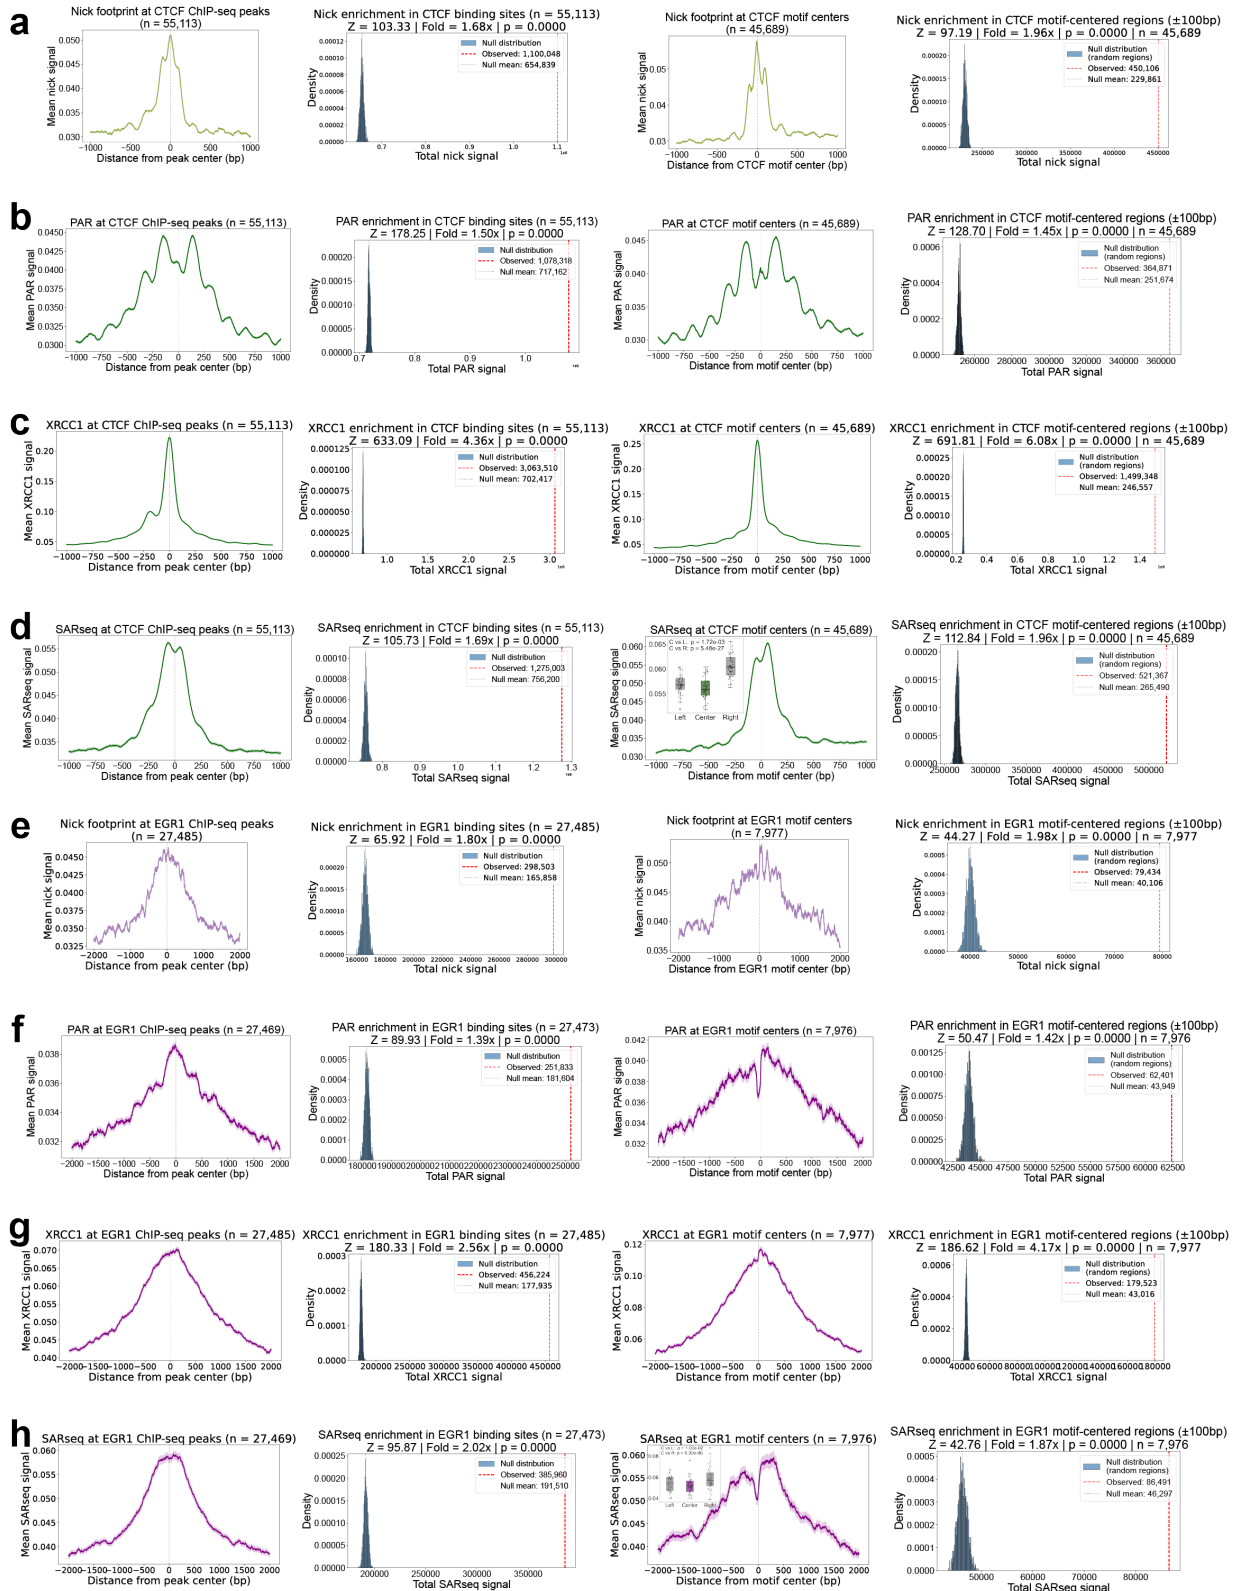

**Extended Data Fig. 13 SSBs accumulate at TF binding sites and engage the DNA repair machinery *in vivo*.**

Genomic analyses integrating four complementary datasets in induced neurons (iNeurons): S1-END-seq (genome-wide SSB detection), PAR ChIP-seq (PARP1 activity), XRCC1 ChIP-seq (SSB repair scaffold recruitment), and SAR-seq (active repair synthesis). Data are shown for CTCF (green, panels a–d) and EGR1 (purple, panels e–h). **(a, e)** Aggregate S1-END-seq signal (mean  $\pm$  95% CI) centered on ChIP-seq peak summits, with permutation test comparing observed nick signal at TF peaks versus 1,000 random genomic shuffles of equivalent size. **(b, f)** Aggregate PAR ChIP-seq signal (mean  $\pm$  95% CI) at ChIP-seq peak summits, with permutation test. **(c, g)** Aggregate XRCC1 ChIP-seq signal (mean  $\pm$  95% CI) at ChIP-seq peak summits, with permutation test. **(d, h)** Aggregate SAR-seq signal (mean  $\pm$  95% CI) at ChIP-seq peak summits, with permutation test. For each panel, aggregate profiles are shown at both ChIP-seq peak level (left) and motif-centered regions  $\pm$ 100 bp (right), with corresponding permutation tests. Fold enrichment, Z-scores, and p-values are indicated in each permutation panel. Detailed methods and data sources are provided in Supplementary Methods. *Insets*: Motif sites for CTCF and EGR1 were randomly partitioned into 50 disjoint subgroups, and the mean signal at the dip center and the two flanking borders was computed per subgroup. Boxplots show these per-subgroup means; individual subgroups are shown as black dots. P-values are from one-sided paired t-tests (center < border). Position labels are in bp relative to the motif center. The center bin is the average signal across  $\pm$ 10 bp around the motif center; the left and right border bins are single positions at  $\pm$ 100 bp for EGR1 and  $\pm$ 50 bp for CTCF.

## Extended Data Table. 1 Comparison of PIC-NIC with prior experimental approaches for probing DNA backbone contributions to protein–DNA recognition

| Approach                                                           | Main perturbation                                                       | Base identity               | Phos identity                             | Backbone continuity disrupted? | Separates phos chemistry from backbone mechanics?                                      | Throughput / scope                                               | Readout                                                        |
|--------------------------------------------------------------------|-------------------------------------------------------------------------|-----------------------------|-------------------------------------------|--------------------------------|----------------------------------------------------------------------------------------|------------------------------------------------------------------|----------------------------------------------------------------|
| <b>a. Classical chemical / footprinting approaches</b>             |                                                                         |                             |                                           |                                |                                                                                        |                                                                  |                                                                |
| Missing contact (PMID: 2958845)                                    | Removes base via depurination/depyrimidation                            | Removed at probed positions | Retained                                  | Mostly no                      | No — loss of base H-bonds and local geometry change are coupled                        | Low; selected positions; one protein at a time                   | Indirect (gel shift + sequencing)                              |
| Missing nucleoside (PMID: 2611245)                                 | Hydroxyl radical removes base + sugar                                   | Removed at probed positions | Often indirectly altered                  | Locally destabilized           | No — base chemistry, stacking, and local geometry all perturbed simultaneously         | Low; one protein/site at a time; not position-specific           | Indirect (gel shift + sequencing)                              |
| Phosphate ethylation interference (PMID: 4033762)                  | Bulky ethyl group added to non-bridging phosphate oxygen                | Retained                    | Chemically modified; charge and H-bonding | Mostly no                      | No — electrostatic, steric, and geometric perturbations are coupled                    | Low; selected proteins/sites                                     | Limited / indirect                                             |
| Methylphosphonate substitution (PMID: 11929991)                    | Neutralization or alteration of phosphate charge; minimal steric change | Retained                    | Altered (charge neutralized)              | Mostly no                      | No — charge and geometry coupled                                                       | Low; selected systems                                            | Quantitative in selected cases                                 |
| Prior systematic nicking (PMID: 10373594; 11689571; 2174540)       | Site-specific nick introducing free 3'-OH and 5'-OH termini             | Varies by approach          | Removed                                   | Yes                            | No — backbone discontinuity and phosphate loss inseparable                             | Low; one or few positions per study; single protein              | Limited / indirect (gel shift or competition assay)            |
| Crystal structures of TF–nicked DNA complexes (e.g. PMID: 1653449) | Nick at defined position; structural snapshot                           | Retained                    | Depends on construct                      | Yes                            | Partial — depends on the construct                                                     | Very low; single TF; single position                             | No binding quantification                                      |
| <b>b. PIC-NIC (our method)</b>                                     |                                                                         |                             |                                           |                                |                                                                                        |                                                                  |                                                                |
| <b>PIC-NIC — phosphate-removed nick</b>                            | Site-specific nick lacking 5' phosphate                                 | Retained                    | Removed                                   | Yes                            | Partial — ambiguity remains, but directly comparable to phosphate-preserving condition | High; all motif positions; 15 TFs spanning 8 structural families | Quantitative binding; selected kinetics and crystal structures |
| <b>PIC-NIC — phosphate-preserving nick</b>                         | Site-specific nick retaining 5' phosphate                               | Retained                    | Retained                                  | Yes                            | <b>All chemical moieties intact, cleaner separations than existing methods</b>         |                                                                  |                                                                |

**Extended Data Table. 2 Crystallographic data collection and refinement statistics: EGR1-DNA complexes**

|                                                         | <b>EGR1-n7</b>           | <b>EGR1-ren5-P</b>       | <b>EGR1-ren7</b>          |
|---------------------------------------------------------|--------------------------|--------------------------|---------------------------|
| <b>Data collection</b>                                  |                          |                          |                           |
| PDB code                                                | 9RIC                     | 9RI6                     | 9RJ6                      |
| Space group                                             | C222 <sub>1</sub>        | C222 <sub>1</sub>        | C222 <sub>1</sub>         |
| Wavelength (Å)                                          | 1.34                     | 1.34                     | 1.34                      |
| Resolution (Å)                                          | 17.23-1.9<br>(2.09-1.90) | 17.43-2.0<br>(2.07-2.00) | 18.38-1.95<br>(2.15-1.95) |
| Cell dimensions                                         |                          |                          |                           |
| <i>a, b, c</i> (Å)                                      | 44.56,56.05,130.21       | 44.77,55.51,129.88       | 44.45,56.16,129.79        |
| $\alpha, \beta, \gamma$ (°)                             | 90,90,90                 | 90,90,90                 | 90,90,90                  |
| R-merge                                                 | 0.053 (0.207)            | 0.073 (0.237)            | 0.100 (0.458)             |
| R-pim                                                   | 0.021 (0.085)            | 0.028 (0.098)            | 0.037 (0.169)             |
| Mean I/sigma (I)                                        | 23.3 (7.5)               | 19.11 (6.5)              | 14.33 (5.2)               |
| Completeness (%)                                        | 99.82 (99.95)            | 99.88 (100.00)           | 99.85 (100.00)            |
| Redundancy                                              | 7.4 (7.0)                | 7.2 (6.7)                | 8.4 (7.8)                 |
| CC <sub>1/2</sub>                                       | 0.999 (0.977)            | 0.998 (0.953)            | 0.997 (0.945)             |
| <b>Refinement</b>                                       |                          |                          |                           |
| No. reflections                                         | 13,206 (3,254)           | 11,283 (2,773)           | 12,198 (2,997)            |
| <i>R</i> <sub>work</sub> / <i>R</i> <sub>free</sub> (%) | 19.2/24.1                | 18.6/21.7                | 19.9/21.2                 |
| R.m.s. deviations                                       |                          |                          |                           |
| Bond lengths (Å)                                        | 0.007                    | 0.008                    | 0.007                     |
| Bond angles (°)                                         | 0.89                     | 0.93                     | 0.91                      |
| Ramachandran                                            |                          |                          |                           |
| Favored (%)                                             | 100.00                   | 98.8                     | 100.00                    |
| Disallowed (%)                                          | 0.00                     | 0.00                     | 0.00                      |
| Clashscore                                              | 0.48                     | 1.44                     | 0.48                      |

**Extended Data Table. 3 Crystallographic data collection and refinement statistics: TBP-DNA complexes**

|                                                         | TBP-TG-P                  | TBP-TG                   | TBP-AG-P                 | TBP-AG                   |
|---------------------------------------------------------|---------------------------|--------------------------|--------------------------|--------------------------|
| <b>Data collection</b>                                  |                           |                          |                          |                          |
| PDB code                                                | 9OW8                      | 9OW7                     | 9OWZ                     | 9OWI                     |
| Space group                                             | P2 <sub>1</sub>           | C222 <sub>1</sub>        | I2                       | P2 <sub>1</sub>          |
| Wavelength (Å)                                          | 1.01                      | 1.01                     | 1.01                     | 1.01                     |
| Resolution (Å)                                          | 48.6-2.60<br>(2.69-2.60)* | 65.7-2.30<br>(2.45-2.30) | 88.3-2.91<br>(3.10-2.91) | 48.3-2.49<br>(2.52-2.48) |
| Cell dimensions                                         |                           |                          |                          |                          |
| <i>a</i> , <i>b</i> , <i>c</i> (Å)                      | 69.1,117.5,102.1          | 77.6,123.4,66.4          | 122.7,106.2,161.9        | 68.6,117.3,102.1         |
| $\alpha$ , $\beta$ , $\gamma$ (°)                       | 90.0,106.9,90.0           | 90.0,90.0,90.0           | 90.0,101.1,90.0          | 90.0,107.0,90.0          |
| R-merge                                                 | 0.083 (0.508)             | 0.053 (0.644)            | 0.076 (0.595)            | 0.086 (0.550)            |
| R-pim                                                   | 0.055 (0.321)             | 0.027 (0.350)            | 0.049 (0.384)            | 0.055 (0.342)            |
| Mean I/sigma (I)                                        | 9.6 (2.3)                 | 13.6 (1.4)               | 8.3 (1.9)                | 9.0 (2.2)                |
| Completeness (%)                                        | 97.7 (99.5)               | 98.6 (90.5)              | 97.5 (98.4)              | 99.1 (98.3)              |
| Redundancy                                              | 3.3 (3.4)                 | 5.8 (5.3)                | 3.3 (3.4)                | 3.5 (3.5)                |
| CC <sub>1/2</sub>                                       | 0.994 (0.794)             | 0.998 (0.851)            | 0.994 (0.679)            | 0.995 (0.759)            |
| <b>Refinement</b>                                       |                           |                          |                          |                          |
| No. reflections                                         | 46965 (4418)              | 17896 (328)              | 43821 (1466)             | 54270 (4434)             |
| <i>R</i> <sub>work</sub> / <i>R</i> <sub>free</sub> (%) | 20.2/25.3                 | 18.9/22.9                | 23.5/25.3                | 20.7/25.1                |
| R.m.s. deviations                                       |                           |                          |                          |                          |
| Bond lengths (Å)                                        | 0.009                     | 0.008                    | 0.012                    | 0.008                    |
| Bond angles (°)                                         | 1.05                      | 1.00                     | 1.28                     | 0.965                    |
| Ramachandran                                            |                           |                          |                          |                          |
| Favored (%)                                             | 96.0                      | 99.0                     | 91.6                     | 95.9                     |
| Disallowed (%)                                          | 0.00                      | 0.00                     | 0.00                     | 0.00                     |
| Clashscore                                              | 18.2                      | 9.69                     | 21.93                    | 14.0                     |

\*Values in parentheses are for the highest-resolution shell.
